# Supplementary material for: Dietary High Salt Intake Exacerbates SGK1-Mediated T Cell Pathogenicity in L-NAME/High Salt-Induced Hypertension
Source: MDPI journal article supplement (doi:10.3390/ijms25084402), 2024-04-16
Supplement: s1 [file s1]

# SUPPLEMENTARY FIGURES

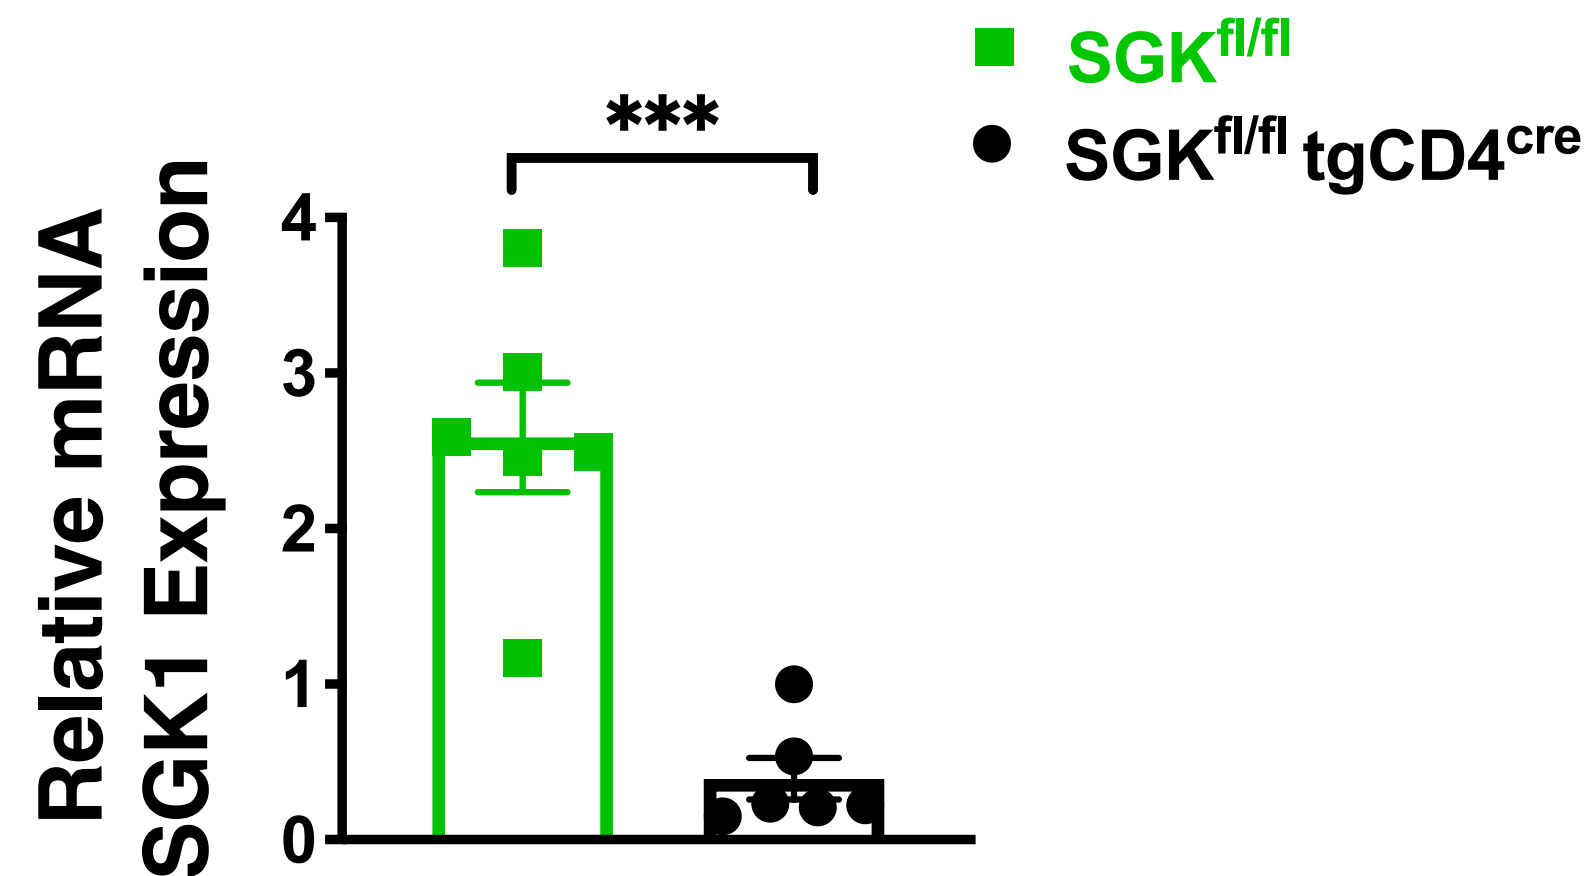

**Figure S1. SGK1 expression in bone marrow T cells.**

T cells were isolated from the bone marrow of  $SGK1^{fl/fl}$  and  $SGK1^{fl/fl}tgCD4^{cre}$  mice using a Miltenyi cell separation kit according to the manufacturer's instructions and a MACS magnetic cell sorter. SGK1 expression was then quantified by RT-qPCR (N=6). Data are expressed as mean  $\pm$  SEM, P-value calculated by independent t-test, \*\*\*  $P < 0.001$ .

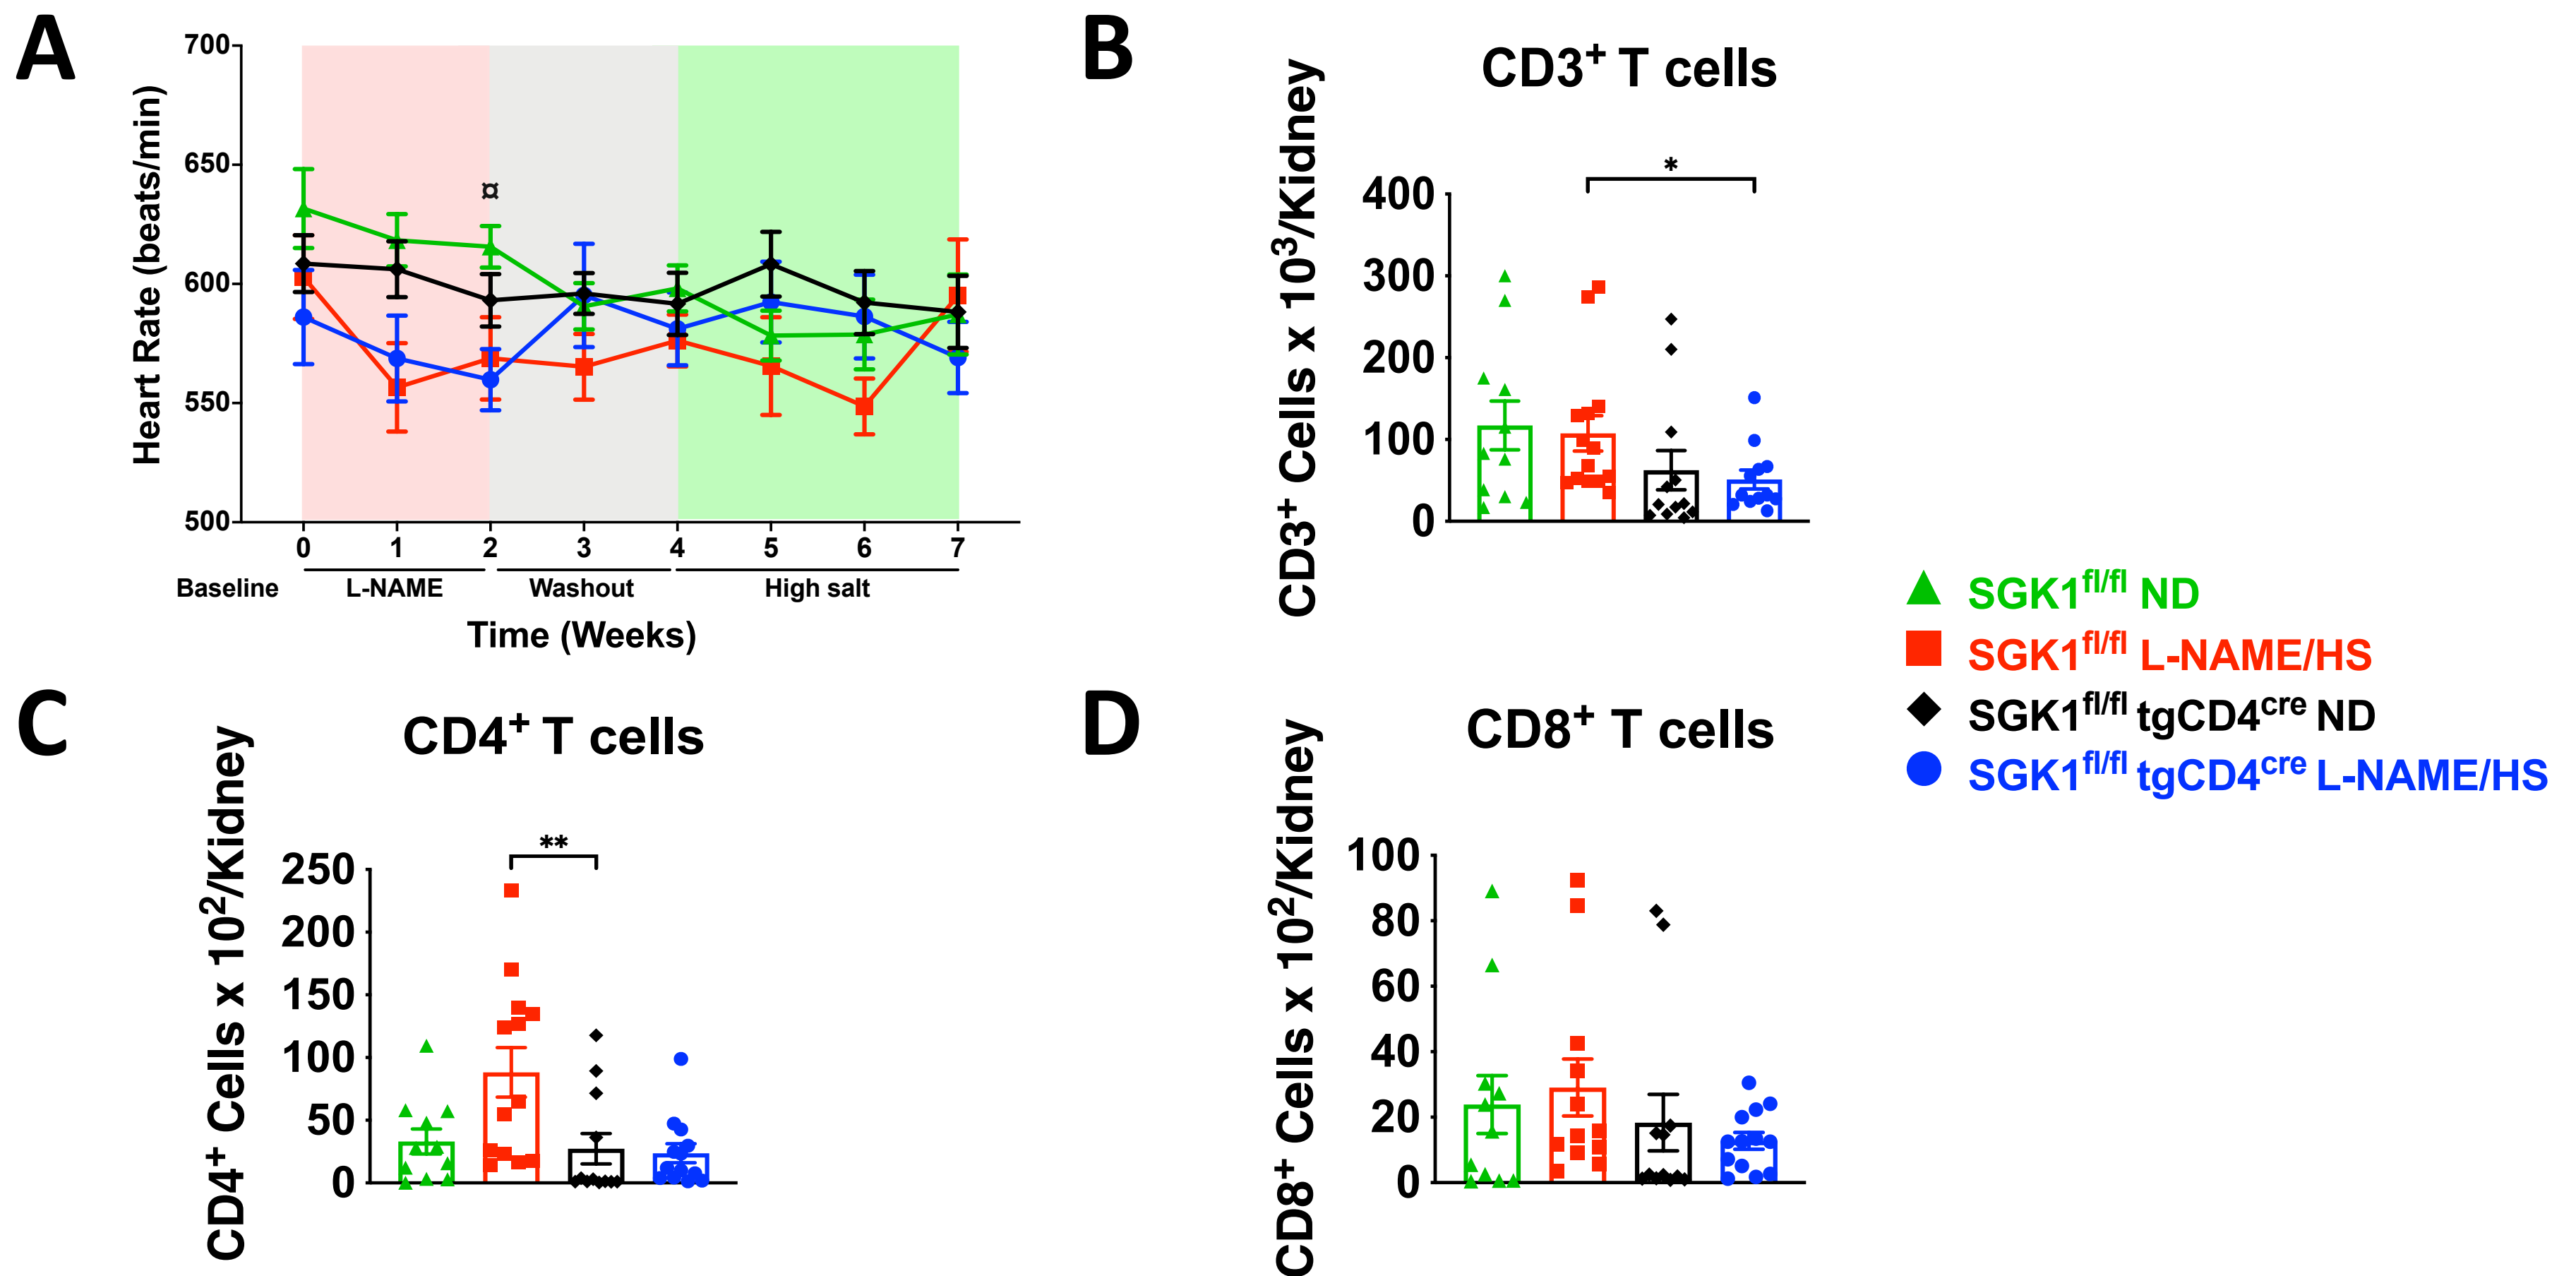

**Figure S2. Differences in Heart rate and in total renal CD3<sup>+</sup>, CD4<sup>+</sup> and CD8<sup>+</sup> T lymphocytes.**

(A) Heart rate measured noninvasively using the tail-cuff method (N=12 -15). Data are expressed as mean  $\pm$  SEM, and P-values calculated by multiple t-tests at each time point multiplied by the number of comparisons are shown.  $\alpha$  P< 0.05 for SGK1<sup>fl/fl</sup>tgCD4<sup>Cre</sup> L-NAME/HS vs. SGK1<sup>fl/fl</sup>tgCD4<sup>cre</sup> ND mice; (B) CD3<sup>+</sup> T lymphocytes; (C) CD4<sup>+</sup> T lymphocytes; (D) CD8<sup>+</sup> T lymphocytes (N=11-14). Data are expressed as mean  $\pm$  SEM, and P-values calculated by 2-way ANOVA are shown. \*P<0.05, \*\* P< 0.01.
